# Supplementary material
Source: HighWire-hosted journal article supplement (https://cmaj.ca/highwire/filestream/148687/field_highwire_adjunct_files/5/221219-guide-4-at.pdf)
Supplement: 221219-guide-4-at.pdf [file 221219-guide-4-at.pdf]

#### Appendix 4: Harms (pharmacological)<sup>1</sup> of screening to prevent fragility fractures

| Outcome;<br>(Systematic review)                                                     | Intervention;                           | Studies; sample size         | Assumed pop. risk <sup>*</sup> | Absolute effects <sup>†</sup> (95% CI)          | RR unless otherwise stated (95% CI)   | Certainty             |
|-------------------------------------------------------------------------------------|-----------------------------------------|------------------------------|--------------------------------|-------------------------------------------------|---------------------------------------|-----------------------|
| <b>Serious Adverse Events</b>                                                       |                                         |                              |                                |                                                 |                                       |                       |
| <b>Atypical femoral fracture;</b><br>(1–4)                                          | Alendronate                             | 1 cohort; 220,360            | 0.06 per 1000                  | 0.08 more per 1000 (0.05 more to 0.14 more)     | HR 2.41 (1.78 to 3.27)                | Low <sup>a,b,e</sup>  |
|                                                                                     |                                         | 1 cohort; 220,360            | 0.03 per 1000                  | 0.06 more per 1000 (0.03 more to 0.10 more)     | HR 2.90 (1.97 to 4.26)                | Low <sup>a,b,e</sup>  |
|                                                                                     | Bisphosphonates<br>(as a class)         | 1 cohort; ~2.8 million       | 0.3 in 1000                    | 11 (7 to 14) more in 10,000                     | OR 126 (55 to 288)                    | Low <sup>a,e</sup>    |
|                                                                                     |                                         | 1 case-control; 1,368        |                                | NA                                              | OR 93 (66 to 132) for >5 years of use |                       |
|                                                                                     |                                         | 1 case-control; 290          |                                | NA                                              | OR 25.65 (10.74 to 61.28)             |                       |
|                                                                                     |                                         | 3 RCT; NR                    |                                | 1.0 more in 1000 (2.6 fewer to 41.1 more)       | 1.33 (0.14 to 14.7)                   | Low <sup>b</sup>      |
|                                                                                     |                                         | 1 SR of 11 observational; NR |                                | 0.2 more in 1000 (0.1 more to 0.4 more)         | 1.70 (1.22 to 2.37)                   |                       |
| Pooled: safety databases; NR                                                        | 1.1 more in 1000 (0.7 more to 1.5 more) | 4.51 (3.44 to 5.92)          |                                |                                                 |                                       |                       |
| <b>Osteonecrosis of the jaw;</b><br>(1–4)                                           | Alendronate                             | 1 cohort; 220,360            | 0.1 per 1000                   | 0.22 more per 1000 (0.04 more to 0.59 more)     | HR 3.15 (1.44 to 6.87)                | Low <sup>a,b,e</sup>  |
|                                                                                     | Bisphosphonates<br>(as a class)         | Case series, SRs; NR         | NR                             | Inconsistent, 0.3 to 43.0 more in 1000          | NA                                    | Low <sup>b</sup>      |
| <b>Non-serious Adverse Events</b>                                                   |                                         |                              |                                |                                                 |                                       |                       |
| <b>Any non-serious adverse event;</b><br>(5)                                        | Zoledronic acid                         | 6 RCT; 9,575                 | 915 in 1000                    | 51.8 more in 1000 (no difference to 112.2 more) | 1.06 (1.00 to 1.13)                   | Moderate <sup>a</sup> |
| <b>Arthritis and arthralgia</b><br>(2–4)                                            | Zoledronic acid                         | 6 RCT; 11,171                | 145 in 1000                    | 178.5 more in 1000 (137.4 more to 224.1 more)   | OR 2.82 (2.32 to 3.45) <sup>‡</sup>   | Moderate <sup>a</sup> |
| <b>Arthralgia, myalgia, pyrexia, chills, &amp; influenza-like symptoms</b><br>(2–4) |                                         | 6 RCT; 11,676                | 219 in 1000                    | 422.8 more in 1000 (398.6 more to 446.3 more)   | OR 6.39 (5.76 to 7.09) <sup>‡</sup>   | Low <sup>a,c</sup>    |
| <b>Chills</b><br>(5)                                                                |                                         | 2 RCT; 799                   | 12 in 1000                     | 33.7 more in 1000 (3.0 more to 127.2 more)      | 3.81 (1.25 to 11.6)                   | Low <sup>a,b,d</sup>  |
| <b>Eczema</b><br>(6,7)                                                              | Denosumab                               | 1 RCT; 7,762                 | 17 in 1000                     | 13.8 more in 1000 (5.8 more to 24.5 more)       | 1.81 (1.34 to 2.44)                   | Low <sup>a,b</sup>    |

<sup>1</sup> Vitamin D and calcium were usually given as part of treatment to both cases and controls

|                                                             |                 |                |              |                                               |                                     |                       |
|-------------------------------------------------------------|-----------------|----------------|--------------|-----------------------------------------------|-------------------------------------|-----------------------|
| <b>Headache</b><br>(5)                                      | Zoledronic acid | 4 RCT; 9,712   | 53 in 1000   | 60.4 more in 1000 (19.1 more to 126.7 more)   | 2.14 (1.36 to 3.39)                 | Moderate <sup>a</sup> |
| <b>Infections</b><br>(2–4)                                  | Denosumab       | 4 RCT; 8,691   | 7 in 1000    | 1.8 more in 1000 (0.1 more to 4.0 more)       | 1.26 (1.01 to 1.57)                 | Moderate <sup>a</sup> |
| <b>Influenza-like symptoms</b><br>(2–4)                     | Zoledronic acid | 5 RCT; 10,695  | 44 in 1000   | 142.5 more in 1000 (105.5 more to 188.4 more) | OR 4.98 (3.82 to 6.58) <sup>†</sup> | Moderate <sup>a</sup> |
| <b>Myalgia</b><br>(2–4)                                     |                 | 5 RCT; 11,065  | 17 in 1000   | 70.7 more in 1000 (54.6 more to 90.8 more)    | OR 5.56 (4.46 to 6.99) <sup>†</sup> | Moderate <sup>a</sup> |
| <b>Non-serious gastrointestinal adverse events</b><br>(2–4) | Alendronate     | 50 RCT; 22,549 | 589 per 1000 | 16.3 more per 1000 (2.4 more to 31.3 more)    | OR 1.07 (1.01 to 1.14) <sup>†</sup> | Moderate <sup>a</sup> |
|                                                             | Denosumab       | 3 RCT; 8,454   | 105 in 1000  | 64.5 more in 1000 (26.4 more to 113.3 more)   | OR 1.74 (1.29 to 2.38) <sup>†</sup> | Moderate <sup>a</sup> |
| <b>Pyrexia</b><br>(5)                                       | Zoledronic acid | 5 RCT; 11,823  | 38 in 1000   | 127.7 more in 1000 (34.6 more to 337.4 more)  | 4.36 (1.91 to 9.88)                 | Moderate <sup>a</sup> |
| <b>Rash or eczema</b><br>(6,7)                              | Denosumab       | 3 RCT; 8,454   | 17 in 1000   | 15.8 more in 1000 (7.6 more to 27.0 more)     | OR 1.96 (1.46 to 2.66) <sup>†</sup> | Moderate <sup>a</sup> |

CI=confidence interval;; HR=Hazard ratio; NA=Not applicable; NR=Not reported; OR=Odds ratio; RCT=Randomized controlled trial; SR=systematic review;

\*The assumed population risk (without treatment) is the median rate in the control group for studies in the analysis. These were extracted directly from the systematic reviews when possible. Data were extracted from the included primary studies when there were  $\leq 5$  in the analysis or from the 5 largest studies from larger analyses to calculate the control event rate.

a=risk of bias; b=inconsistency; c=indirectness; d=imprecision; e=Large magnitude of effect (+1)

†The absolute effect (and its 95% CI) is based on applying the relative effect of the intervention (and its 95% CI) to the assumed risk. When an OR is presented, the following formula was used: intervention risk per 1000 = 1000 x (OR x ACR / 1 – ACR + (OR x ACR)) (8) ACR=Assumed control risk.

‡Odds ratio derived from exact logistic regression meta-analysis (109).

## References

1. Fink HA, MacDonald R, Forte ML, Rosebush CE, Ensrud KE, Schousboe JT, et al. Long-Term Drug Therapy and Drug Discontinuations and Holidays for Osteoporosis Fracture Prevention: A Systematic Review. *Ann Intern Med.* 2019 Nov;171(1):37–50.
2. Qaseem A, Forciea MA, McLean RM, Denberg TD. Treatment of low bone density or osteoporosis to prevent fractures in men and women: A clinical practice guideline update from the American college of physicians. *Ann Intern Med.* 2017 Jun;166(11):818–39.
3. Crandall CJ, Newberry SJ, Diamant A, Lim Y-W, Gellad WF, Booth MJ, et al. Comparative effectiveness of pharmacologic treatments to prevent fractures: an updated systematic review. *Ann Intern Med.* 2014 Nov;161(10):711–23.
4. Crandall CJ, Newberry SJ, Gellad WG, Diamant A, Lim YW, Suttrop M, et al. Treatment to Prevent Fractures in Men and Women with Low Bone Density or Osteoporosis: Update of a 2007 Report. Comparative Effectiveness Review No. 53. (Prepared by Southern California Evidence-based Practice Center under Contract No. HHS-290-2007-10062-I.). Rockville, MD: Agency for Healthcare Research and Quality; 2012.
5. Davis S, Martyn-St James M, Sanderson J, Stevens J, Goka E, Rawdin A, et al. A systematic review and economic evaluation of bisphosphonates for the prevention of fragility fractures. *Health Technol Assess (Rockv).* 2016 Oct;20(78):1–406.
6. Viswanathan M, Reddy S, Berkman N, Cullen K, Middleton JC, Nicholson WK, et al. Screening to Prevent Osteoporotic Fractures: An Evidence Review for

the U.S. Preventive Services Task Force. Evidence Synthesis No.162. Rockville, MD: Agency for Healthcare Research and Quality; 2018.

7. Viswanathan M, Reddy S, Berkman N, Cullen K, Middleton JC, Nicholson WK, et al. Screening to Prevent Osteoporotic Fractures. *JAMA*. 2018 Jun 26;319(24):2532.
8. Higgins J, Thomas J, Chandler J, Cumpston M, Li T, Page M, et al. *Cochrane Handbook for Systematic Reviews of Interventions* version 6.2 [Internet]. 2021 [cited 2021 Nov 19]. Available from: [www.training.cochrane.org/handbook](http://www.training.cochrane.org/handbook)
